# Supplementary material
Source: Springer Nature journal article supplement (https://www.springermedizin.de/resource/supplementary/12967_2008_291_MOESM2_ESM.pdf/9576124)

### (A) TIL cell binding

-Percent CD8 positive/tetramer positive cells from upper right quadrant in each blot are shown.

#### TIL1520 (upper left)

- CD8 FITC vs. Negative PE

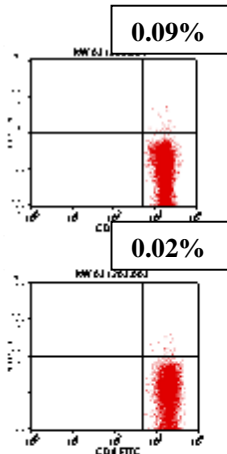

#### TIL1520 (upper right)

-CD8 FITC vs. gp100 PE

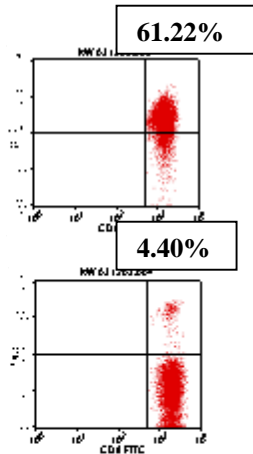

#### TIL1143 (lower left)

-CD8 FITC vs. Negative PE

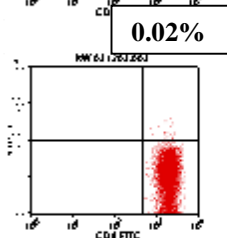

#### TIL1143 (lower right)

-CD8 FITC vs. MART-1 PE

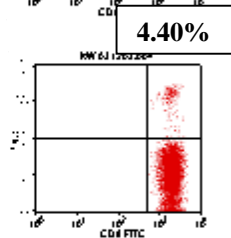

### (B) MART-1 Jurkat cell binding

-% CD8 positive/tetramer positive cells from upper right quadrant for MART-1 Jurkat cells are shown

#### Control Jurkat (upper left)

-CD8 FITC vs. gp100 PE

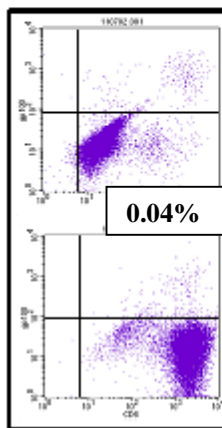

#### Control Jurkat (upper right)

-CD8 FITC vs. MART-1 PE

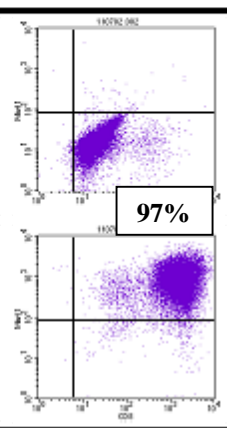

#### MART-1 Jurkat (lower left)

-CD8 FITC vs. gp100 PE

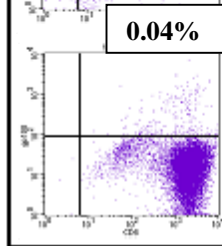

#### MART-1 Jurkat (lower right)

-CD8 FITC vs. MART-1 PE

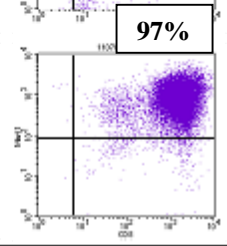

Supplement: MOESM2 [file 9576124]
